# Supplementary material
Source: publisher figshare collection journal article supplement (https://acs.figshare.com/ndownloader/files/11461016)
Supplement: Supplementary file 1 [file 11461016]

## Supporting Information

# ETHANE-BRIDGED BIS-PORPHYRIN CONFORMATIONAL CHANGES AS AN EFFECTIVE ANALYTICAL TOOL FOR NON-ENZYMATIC DETECTION OF UREA IN THE PHYSIOLOGICAL RANGE.

Alessandro Buccolieri,<sup>†</sup> Mohammed Hasan,<sup>‡</sup> Simona Bettini,<sup>§±</sup> Valentina Bonfrate,<sup>§</sup> Luca Salvatore,<sup>§</sup> Angelo Santino,<sup>#</sup> Victor Borovkov\*,<sup>‡,⊥</sup> Gabriele Giancane\*<sup>||,±</sup>

<sup>†</sup> Department of Biological and Environmental Sciences and Technologies (DiSTeBA), Università del Salento, Via per Arnesano, Lecce, Italy

<sup>‡</sup> Department of Chemistry and Biotechnology, Tallinn University of Technology, Akadeemia tee 15, Tallinn, Estonia

<sup>§</sup> Department of Engineering for Innovation, University of Salento, Via Per Arnesano, Lecce, Italy

<sup>#</sup> Institute of Sciences of Food Production, C.N.R., Unit of Lecce, via Monteroni, 73100 Lecce, Italy

<sup>⊥</sup> College of Chemistry and Materials Science, South-Central University for Nationalities, 182# Minzu RD, Hongshan District, Wuhan, Hubei province, 430074, China

<sup>||</sup> Department of Cultural Heritage, Università del Salento, Via D. Birago, Lecce, Italy

<sup>±</sup> UdR INSTM of Lecce University of Salento Via Monteroni, 73100 Lecce (Italy)

Corresponding authors' email addresses: [gabriele.giancane@unisalento.it](mailto:gabriele.giancane@unisalento.it); [victor.borovkov@scuec.edu.cn](mailto:victor.borovkov@scuec.edu.cn)

### Synthetic Procedures:

#### a) Synthesis of 2 (Ni-H<sub>2</sub>Por<sub>2</sub>):-

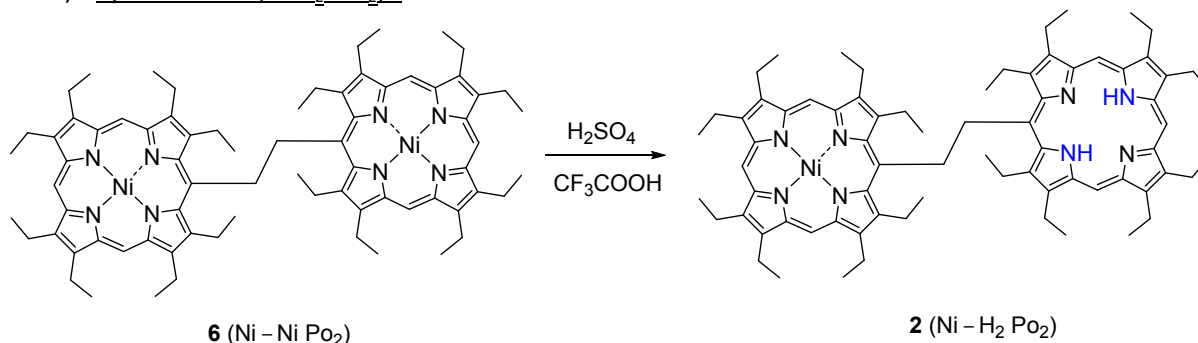

### Procedure:

Bis-OEP-Ni dimer **6** (Ni-Ni Por<sub>2</sub>) (20 mg) was dissolved in 0.2 ml of trifluoroacetic acid (TFA) and stirred for 15 min. To this mixture 10% H<sub>2</sub>SO<sub>4</sub> in TFA (0.4 ml) was added and reaction was stirred for 4 h followed by pouring into ice and neutralizing with aqueous ammonia solution. The compound was extracted with chloroform, dried, concentrated and subsequently purified over silica gel column using chloroform as eluent. The isolated yield of the desired product **2** (Ni-H<sub>2</sub> Por<sub>2</sub>) was 10.2 mg (71%) (based on conversion, 5 mg unreacted starting material), which was further crystallized in chloroform-methanol solvent.

<sup>1</sup>H NMR (CDCl<sub>3</sub>, 400 MHz):- 9.94 (s, 2H, *meso*), 9.85 (s, 1H, *meso*), 9.51 (s, 1H, *meso*), 9.34 (2H, *meso*), 4.48 (m, 2H, bridge –CH<sub>2</sub>), 4.41(t, 2H, bridge –CH<sub>2</sub>), 4.11–3.33 (m, 32H, –CH<sub>2</sub>) 1.93–1.03 (m, 48H, –CH<sub>3</sub>), -2.9 (s, 1H, -NH), -2.7 (s, 1H, -NH)

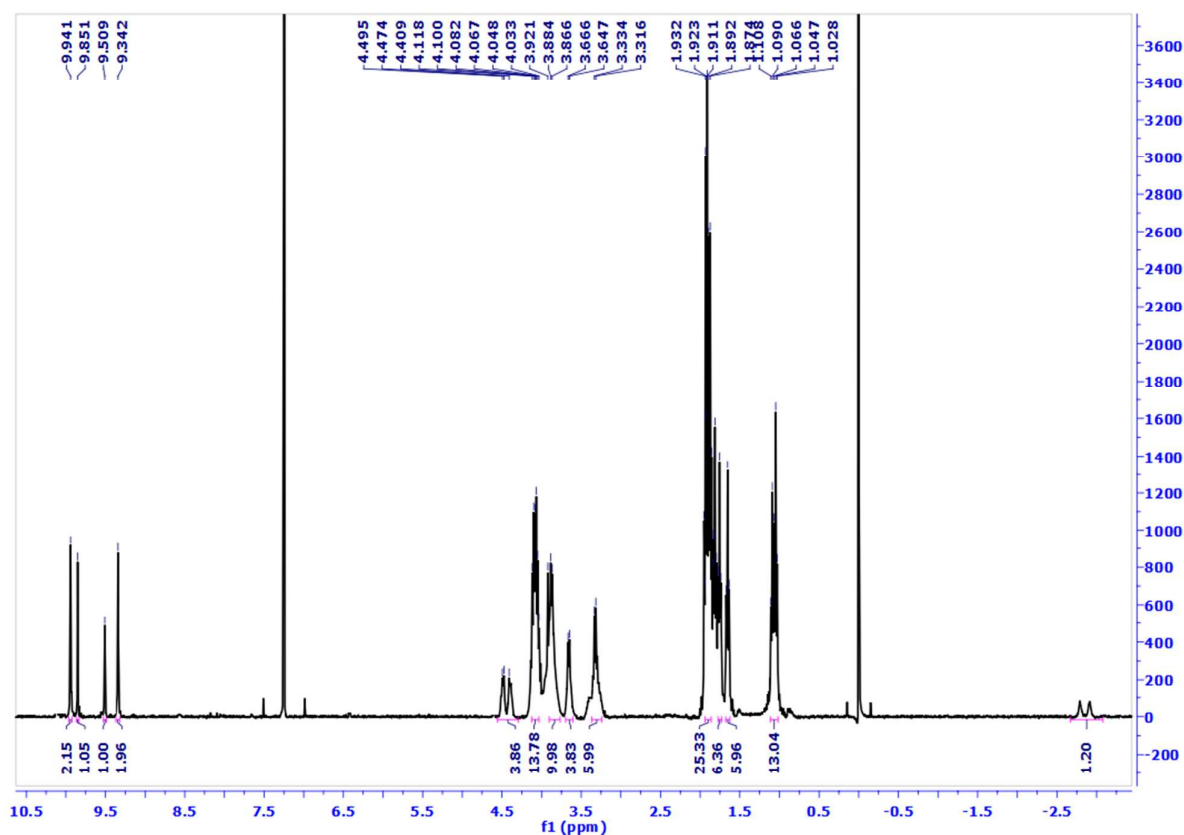

a) Synthesis of 4 (Ni-Zn Por<sub>2</sub>):-

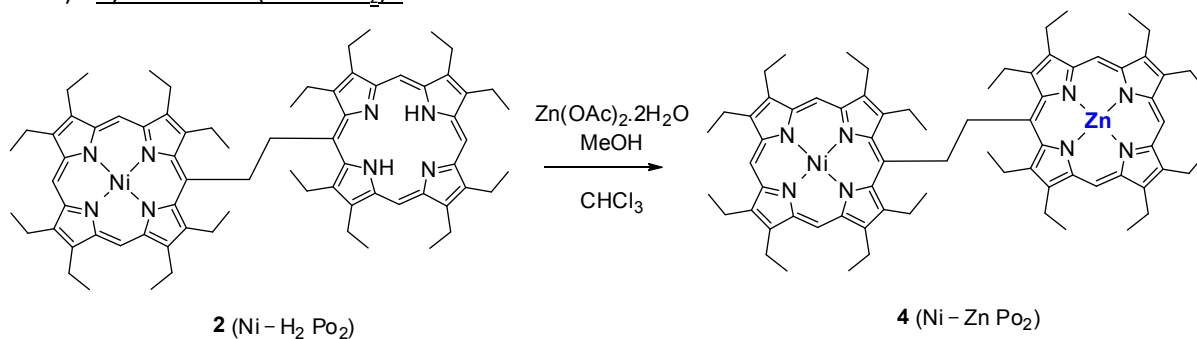

**Procedure:**

MeOH solution of  $\text{Zn(OAc)}_2 \cdot 2\text{H}_2\text{O}$  (4 mg in 2 ml) was added dropwise to a solution of **2** (Ni-H<sub>2</sub> Por<sub>2</sub>) (10 mg) in  $\text{CH}_2\text{Cl}_2$  (10 ml) within 10 min. The reaction was stirred overnight at room temperature. On completion (monitored by TLC), reaction mass was diluted with  $\text{CH}_2\text{Cl}_2$  (10 ml), washed with water and dried over sodium sulfate. The crude product was passed through a short silica gel column to obtain the desired product 10.5 mg in quantitative (>99%) yield, which was crystallised using chloroform-methanol solvent.

<sup>1</sup>H NMR ( $\text{CDCl}_3$ , 400 MHz):- 9.96 (s, 1H, *meso*), 9.49 (s, 2H, *meso*), 9.47 (s, 1H, *meso*), 8.75 (2H, *meso*), 4.59 (t, 2H, bridge -CH<sub>2</sub>), 4.44 (t, 2H, bridge -CH<sub>2</sub>), 4.15–3.17 (m, 32H, -CH<sub>2</sub>) 1.93–1.03 (m, 48H, -CH<sub>3</sub>).

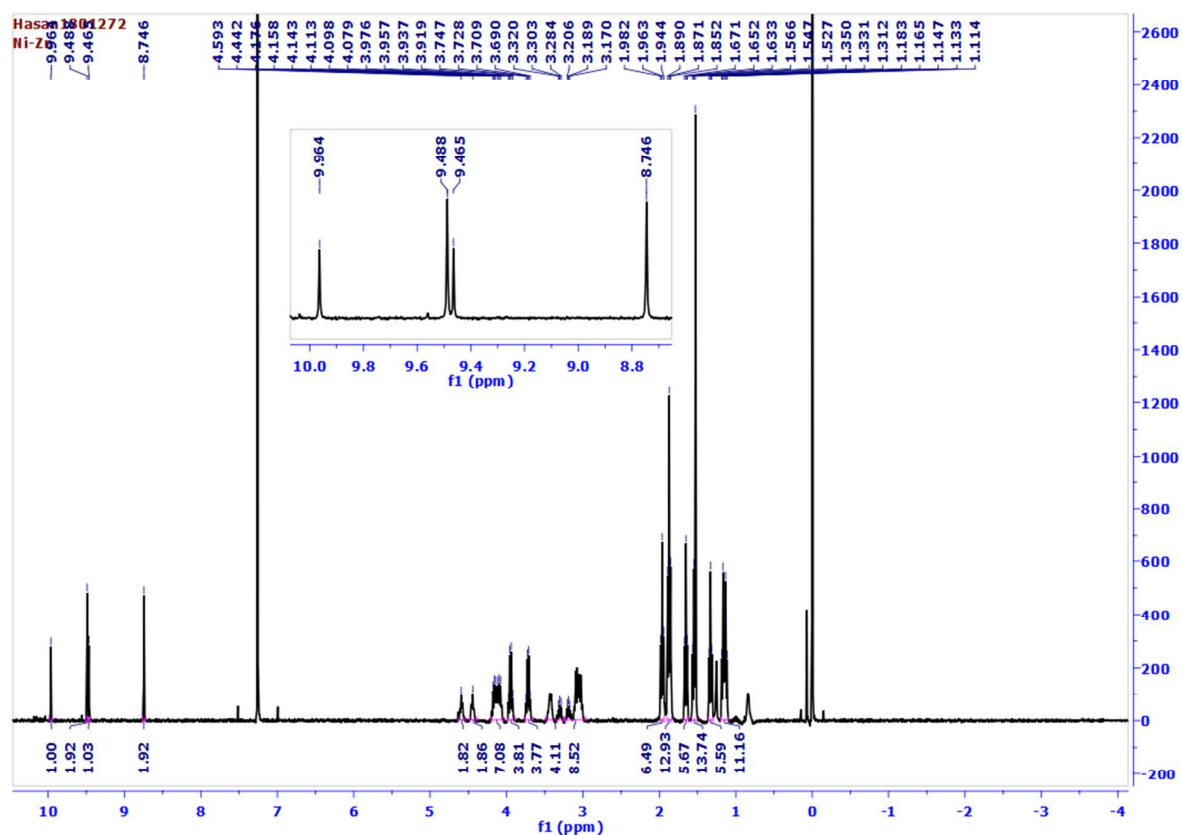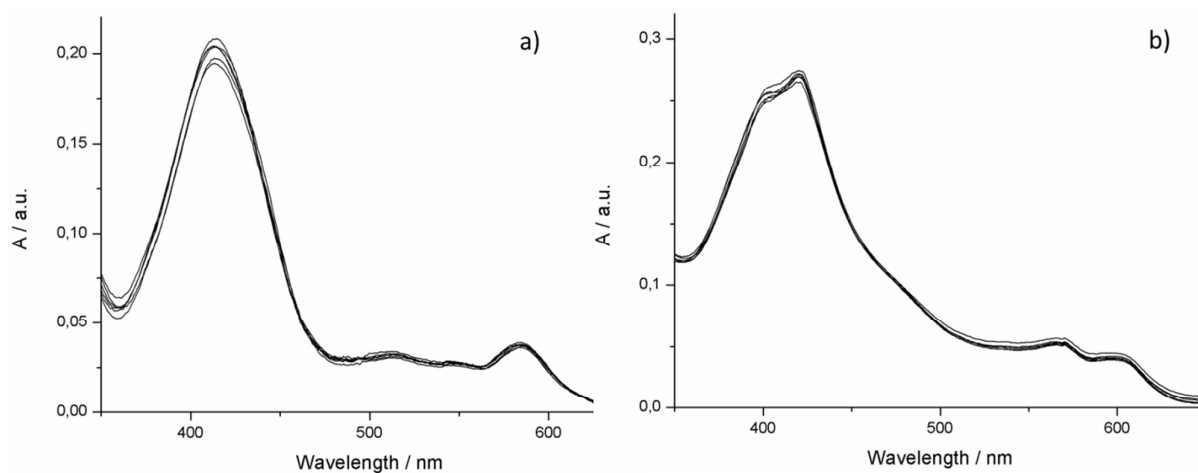

Figure S1. Influence of the temperature on spin-coated films of **2** (box a) and **3** (box b) in the range 5-60 °C (with a step of 5 °C).

Table S1. Fluorescence variations induced by the temperature on the **2** and **3** active films.

| Temperature(°) | $I/I_0$ (on active film <b>2</b> ) | $I/I_0$ (on active film <b>3</b> ) |
|----------------|------------------------------------|------------------------------------|
| 5              | 0.98                               | 0.95                               |
| 25             | 1                                  | 1                                  |
| 30             | 0.99                               | 0.98                               |
| 40             | 0.97                               | 0.96                               |
| 50             | 0.91                               | 0.85                               |
| 60             | 0.85                               | 0.80                               |
